# Supplementary material
Source: publisher site journal article supplement (https://www.dovepress.com/article/368792)
Supplement: Supplementary file 1 [file get_supplementary_file.php]

**Supplementary material**

**Table S1** Overall comparison of significant variables of invasive *Candida* infections, *Candida* colonization and control

| **Variables** | **Patients with invasive *Candida* infections,**  ***n* = 75 (%)** | **Patients with *Candida* colonization,**  ***n* = 58 (%)** | **Patients without *Candida*,**  ***n* = 60 (%)** | ***P value*** |
| --- | --- | --- | --- | --- |
| **Clinical risk factors** |  |  |  |  |
| ***Invasive interventions*** |  |  |  |  |
| Surgical procedures | 37 (49.33) | 26 (44.83) | 12 (20.00) | 0.001 |
| Urethral catheters | 34 (45.33) | 32 (55.17) | 17 (28.33) | 0.012 |
| Ventilatory support | 24 (32.00) | 22 (37.93) | 13 (21.67) | 0.150 |
| Tracheal intubation | 23 (30.67) | 29 (50.00) | 14 (23.33) | 0.007 |
| Arteriovenous cannulation | 21 (28.00) | 30 (51.72) | 17 (28.33) | 0.005 |
| Tracheotomy | 12 (16.00) | 8 (13.79) | 0 (0.00) | 0.006 |
| PD or hemodialysisa | 3 (4.00) | 4 (6.90) | 5 (8.33) | 0.611 |
| ***Immune state*** |  |  |  |  |
| Immunosuppressive therapy | 3 (4.00) | 3 (5.17) | 3 (5.00) | 1.000 |
| ***Comorbidities*** |  |  |  |  |
| Cancers | 18 (24.00) | 27 (46.55) | 5 (8.33) | < 0.0001 |
| Diabetes mellitus | 7 (9.33) | 9 (15.52) | 7 (11.67) | 0.550 |
| Liver cirrhosis | 1 (1.33) | 2 (3.45) | 0 (0.00) | 0.389 |
| ***Concurrent Candida infections*** | 24 (32.00) | 9 (15.52) | 0 (0.00) | < 0.0001 |
| ***Co-infections of bacteria*** | 49 (65.33) | 42 (72.41) | 28 (46.67) | 0.011 |
| **Clinical outcomes** |  |  |  |  |
| Improvement | 44 (58.67) | 40 (68.97) | 54 (90.00) | < 0.001 |
| Deterioration | 8 (10.67) | 2 (3.45) | 6 (10.00) | 0.304 |
| Moribund | 2 (2.67) | 1 (1.72) | 0 (0.00) | 0.638 |

**Note:** aPD, peritoneal dialysis.

**Table S2** Prior azole treatment in patients of invasive *Candida* infection vs colonization

| **Groups** | **Prior azole treatment**a  ***n* (%)** |
| --- | --- |
| Invasive *Candida* infection (*n* = 75) | 38 (50.67) |
| *Candida* colonization (*n* = 58) | 11 (18.97) |

**Note:** aAzole treatment before identification of *Candida* isolates in laboratory.
